# Supplementary material for: Soybean resilience to drought is supported by partial recovery of photosynthetic traits
Source: PubMed Central journal article supplement (PMC9632626; doi:10.3389/fpls.2022.971893), 2022-10-20
Supplement: DataSheet_1.pdf [file DataSheet_1.pdf]

## Supplementary Material

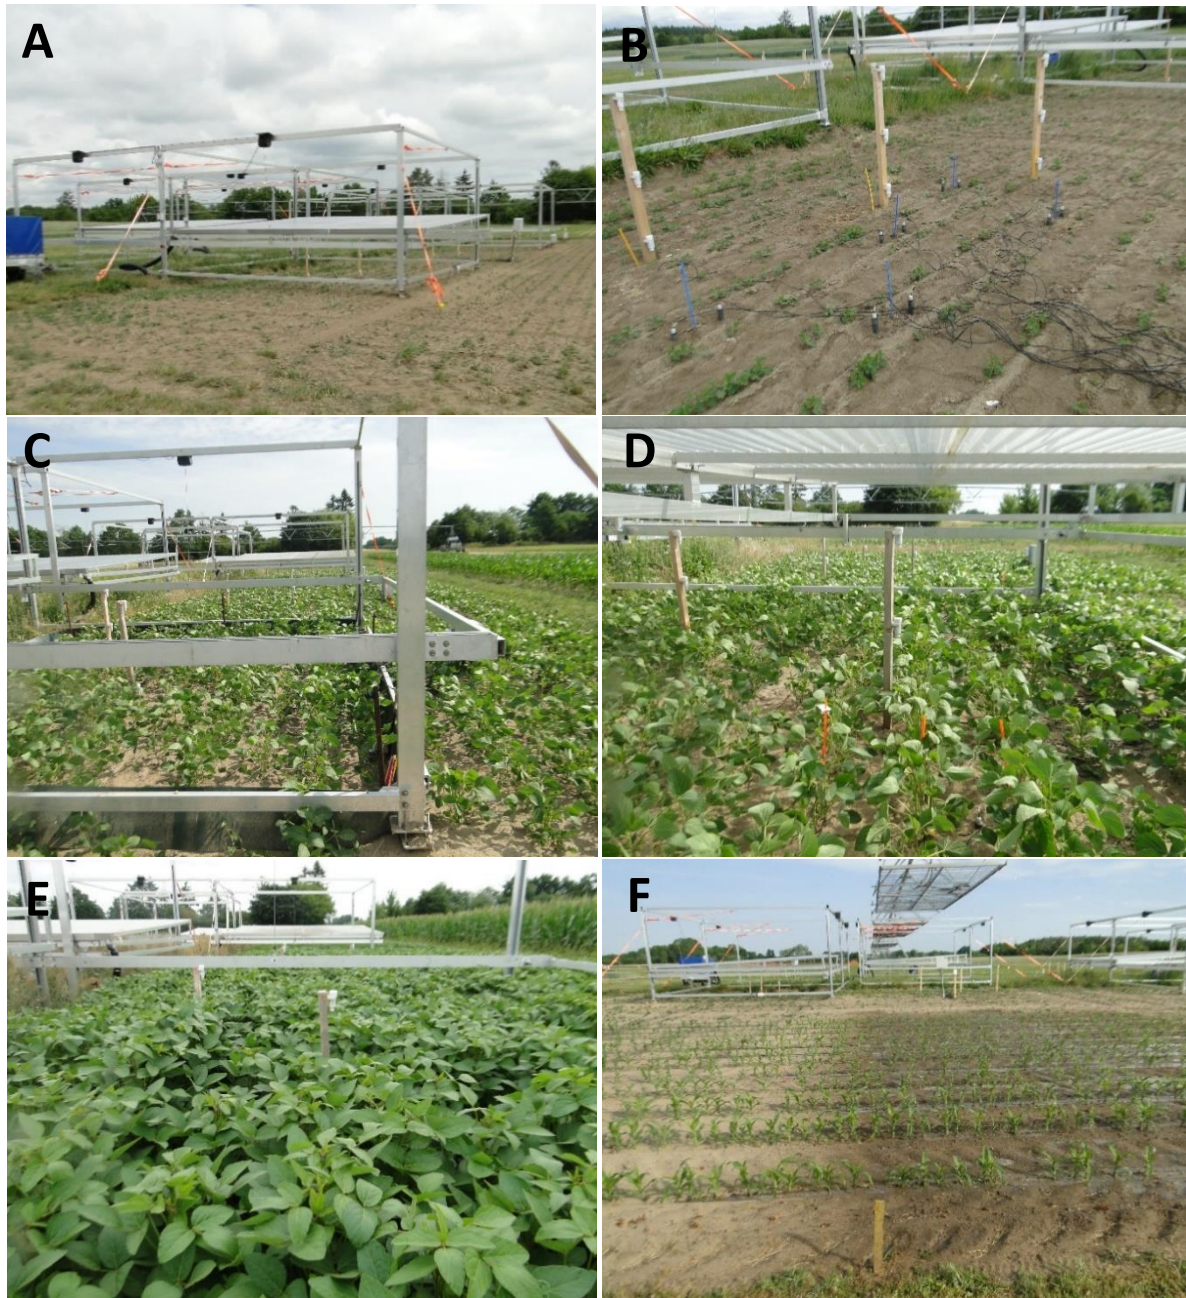

**FIGURE S1** | Photographs showing the installation of the rainout-shelter (A), sensors to measure soil and air moisture and temperature on 5<sup>th</sup> June 2020 (B); the rainout-shelter in use, open in the front (after it was closed during vegetative stage) and closed in the back at flowering stage (C), one plot in focus with the roof closed at the flowering stage (D) on 29<sup>th</sup> June 2021; the rainout-shelter in use, open in the front (after it was closed during vegetative stage) and closed in the back at flowering stage on 21<sup>st</sup> July 2021 (E); and a test of the irrigation system on 9<sup>th</sup> June 2020 (F). Pictures by G. Rosner/ZALF.

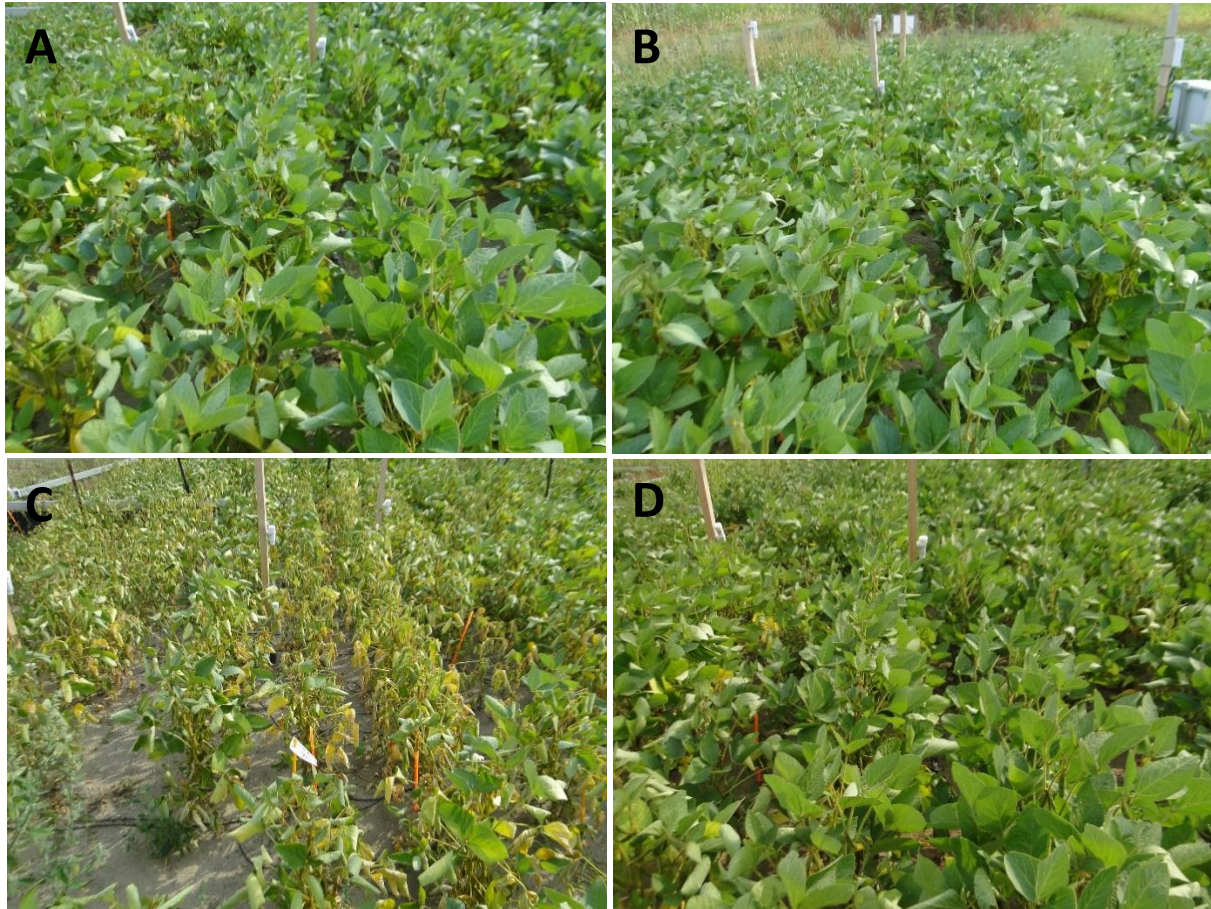

**FIGURE S2** | Soybean plots after induced drought stress on 10<sup>th</sup> August 2020 and the treatments irrigated (A), rainfed (B), drought during vegetative stage (C) and drought during flowering stage (D). Pictures by G. Rosner/ZALF.

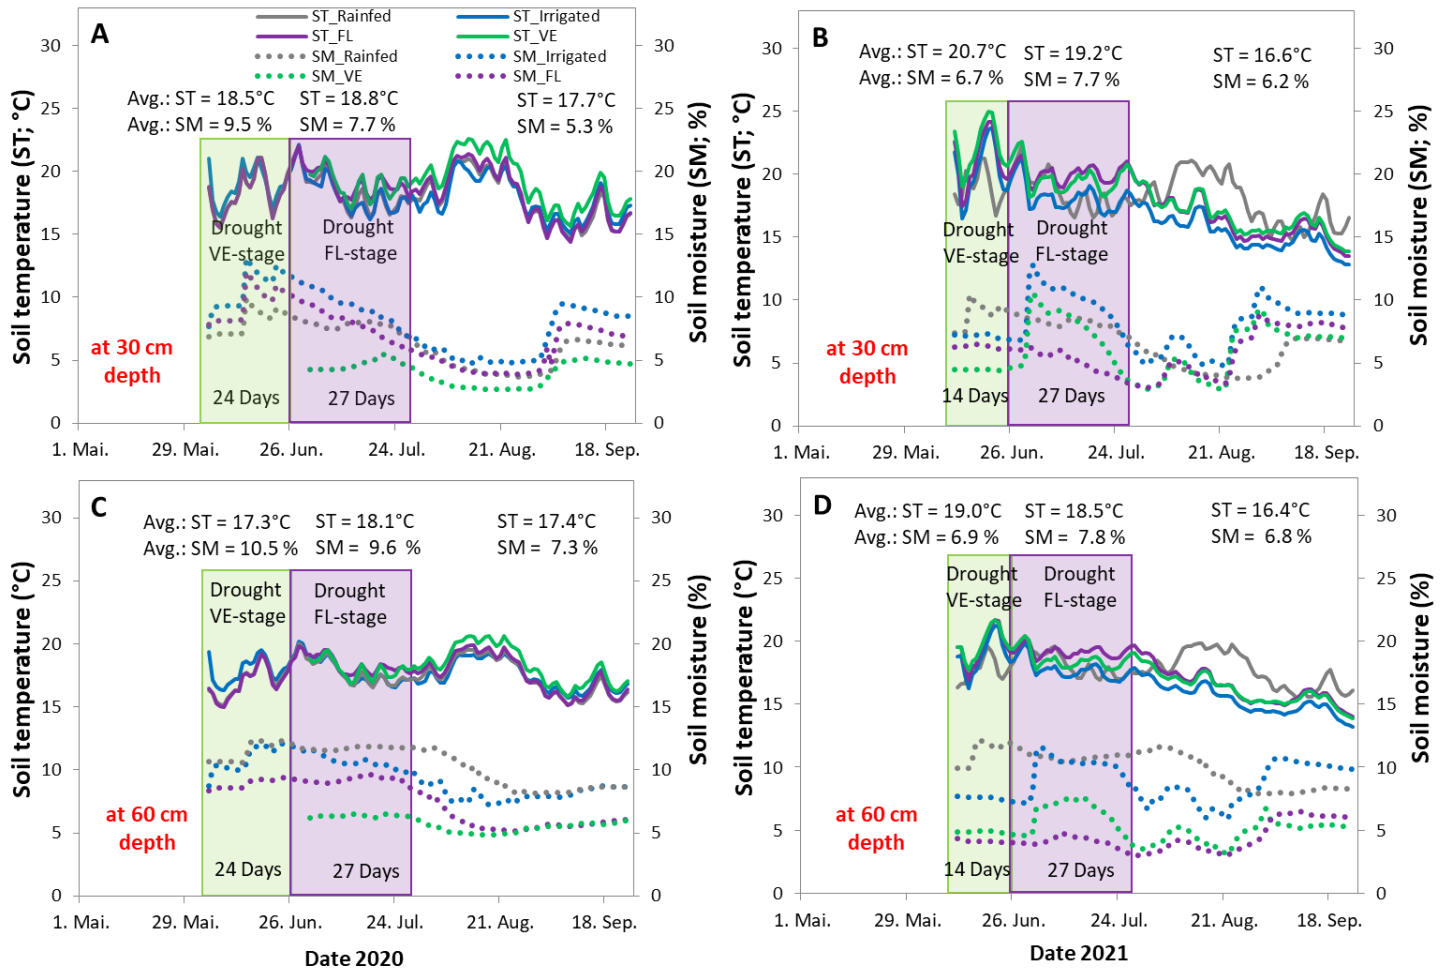

**FIGURE S3** | Soil temperature (left axis) and soil moisture (right axis) at 30 and 60 cm height from the beginning of May until the end of September in 2020 (Panels A and C) and 2021 (panels B and D). The green shaded area indicates the duration of using a shelter above the plants at vegetative stage (V-stage) and the violet shaded area indicates the duration of using a shelter above the plants at flowering stage (Fl-stage).

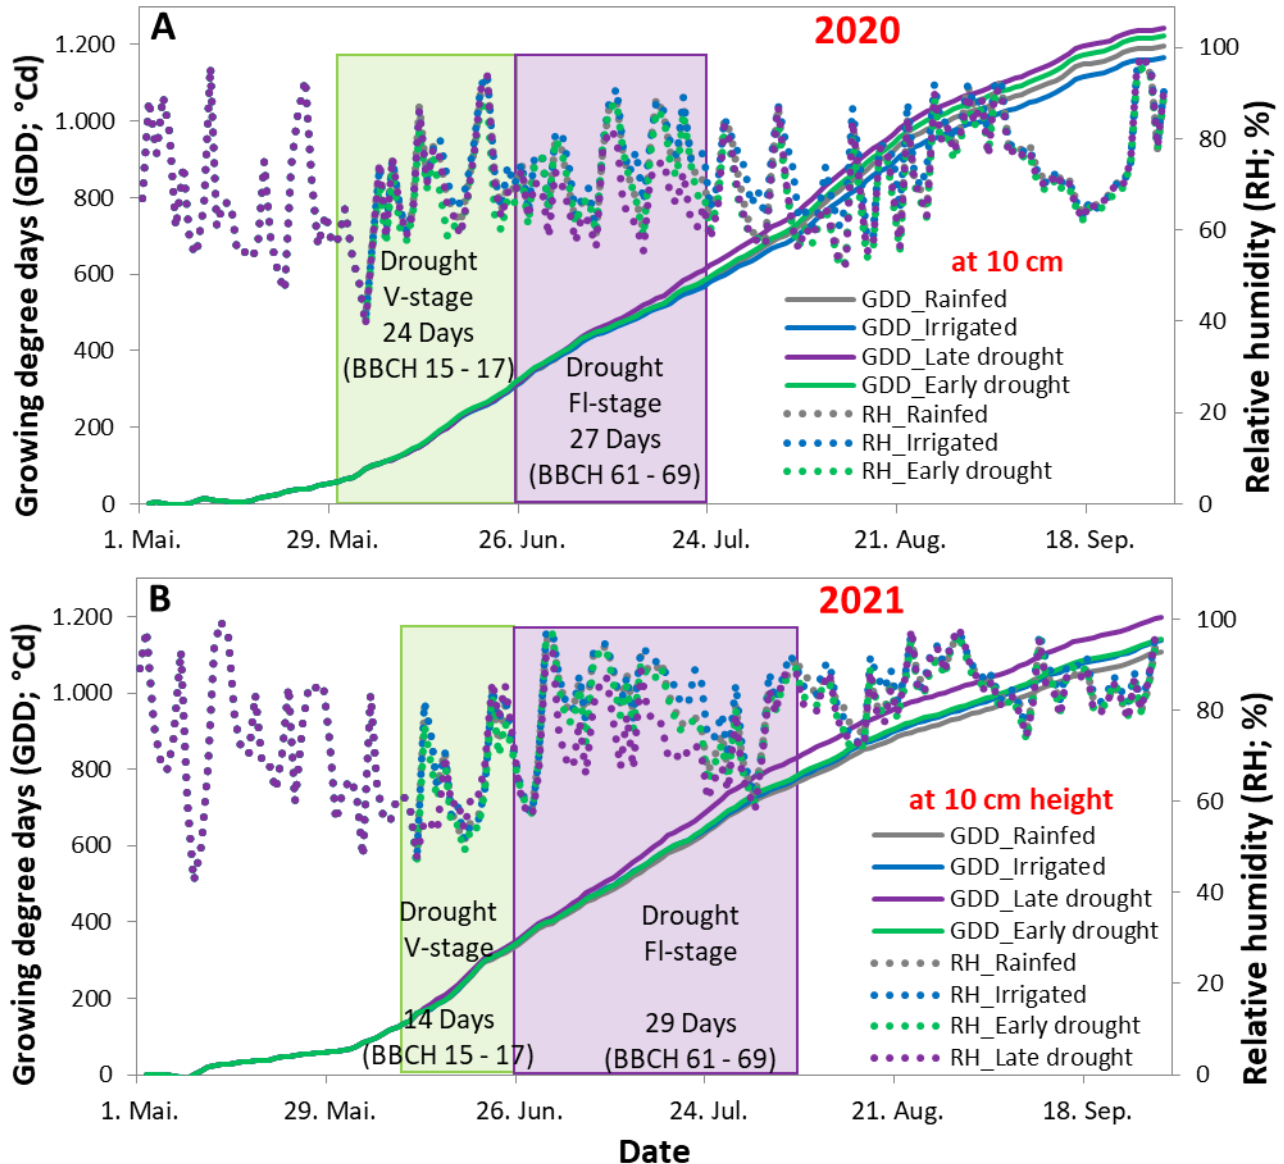

**FIGURE S4** | Growing degree days (GDD; left axis; panels A and B) and relative humidity (right axis; panels A and B) from the beginning of May until the end of September in the season 2020 (A) and 2021 (B), the control treatment (rainfed; gray solid and dashed lines), the irrigated treatment (blue solid and dashed lines), the early drought treatment (green solid and dashed lines), the late-drought treatment (violet solid and dashed lines). The green shaded area indicates the duration of using a shelter above the plants at the vegetative stage (V-stage) and the violet shaded area indicates the duration of using a shelter above the plants at the flowering stage (Fl-stage).

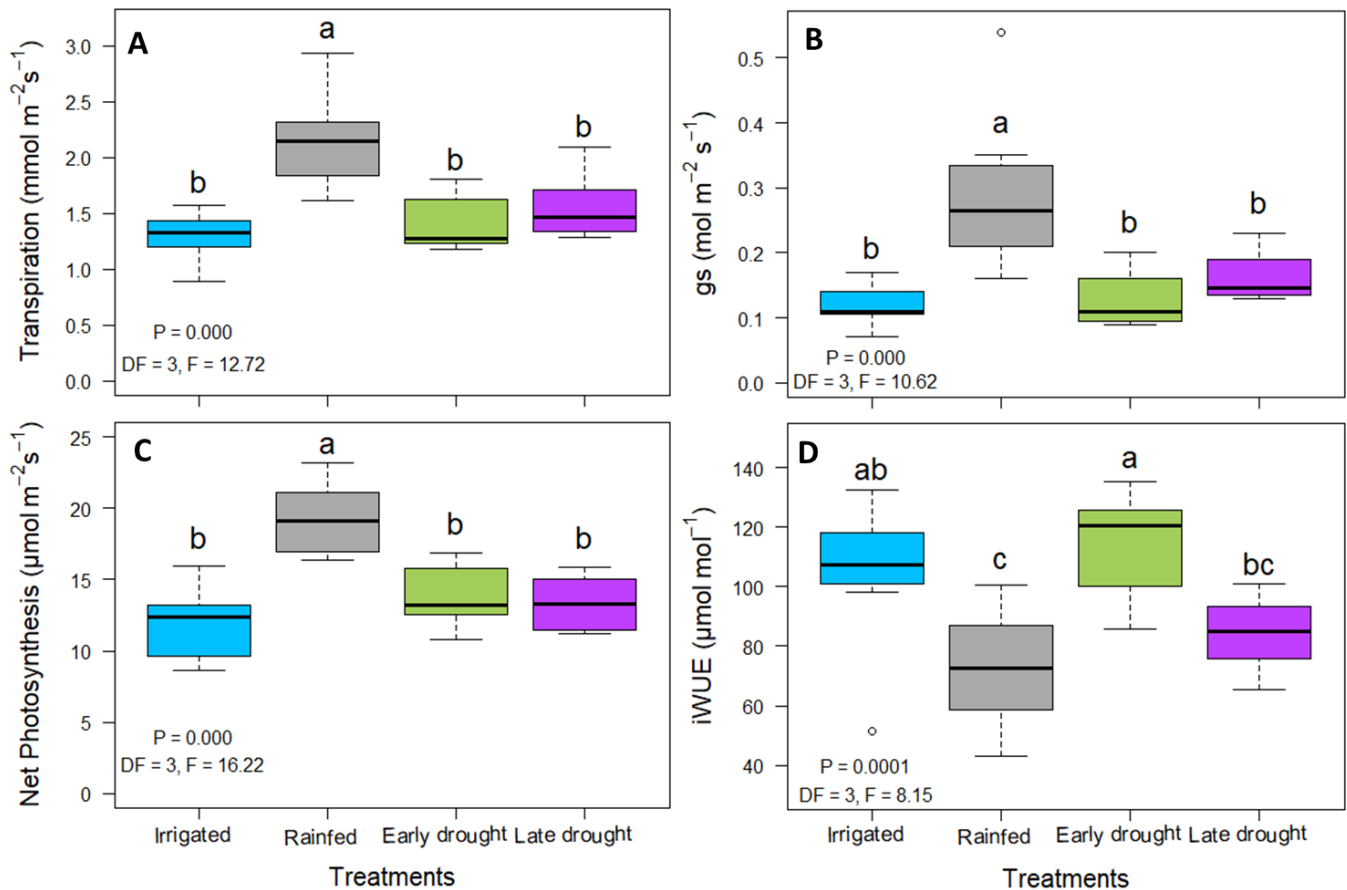

**FIGURE S5** | Boxplot of photosynthetic parameters of soybean under four water treatments in 2021, transpiration (A), stomatal conductance (B), net photosynthesis (C), and intrinsic water use efficiency (D). The different letters above the boxplots represent Tukey's HSD test ( $p < 0.05$ ) among the different treatments ( $n = 8$ ). Photosynthetic parameters were measured on 18.08.2021 between 08:00 to 11:00 h, in a fully expanded leaf at the eighth node. The following settings of  $PAR_i = 1,000$ , flow =  $500 \mu\text{mol mol}^{-1}$ , stomatal ratio = 0.5, and reference  $\text{CO}_2$  concentration =  $400 \mu\text{mol mol}^{-1}$  were used.

**TABLE S1** | Dates and amount of irrigated water for soybean (cv. Acardia) during the two growing seasons 2020 and 2021.

| <b>Year</b> | <b>Date</b> | <b>Amount of irrigation (mm)</b> |
|-------------|-------------|----------------------------------|
| 2020        | 18.06.2020  | 20                               |
| 2020        | 24.06.2020  | 20                               |
| 2020        | 03.07.2020  | 20                               |
| 2020        | 13.07.2020  | 20                               |
| 2020        | 22.07.2020  | 20                               |
| 2020        | 29.07.2020  | 20                               |
| 2020        | 31.07.2020  | 20                               |
| 2020        | 04.08.2020  | 20                               |
| 2020        | 05.08.2020  | 20                               |
| 2020        | 11.08.2020  | 20                               |
| 2020        | 12.08.2020  | 20                               |
| 2020        | 14.08.2020  | 20                               |
| 2020        | 21.08.2020  | 20                               |
| 2020        | 26.08.2020  | 20                               |
| Sum in 2020 |             | 280                              |
| 2021        | 17.06.2021  | 20                               |
| 2021        | 23.06.2021  | 20                               |
| 2021        | 15.07.2021  | 20                               |
| 2021        | 22.07.2021  | 20                               |
| 2021        | 05.08.2021  | 20                               |
| 2021        | 17.08.2021  | 20                               |
| 2021        | 18.08.2021  | 20                               |
| Sum in 2021 |             | 140                              |

**TABLE S2** | Model selection, based on AICc comparison, of linear mixed model (lme) describing plant height, chlorophyll florescence ratio (ChlF ratio), chlorophyll content (Chlc), and leaf surface temperature (LST) of soybean under four water treatments (Trt) at different times of crop growth (Tim) in two years (Yr).

| Model | (Int) | T   | Trt | Yr | T:Trt | T:Yr | Trt:Yr | T:Trt:<br>Yr | family                 | correlation | weights                   | random | df | logLik | AICc   | delta | weight | p-value |
|-------|-------|-----|-----|----|-------|------|--------|--------------|------------------------|-------------|---------------------------|--------|----|--------|--------|-------|--------|---------|
| lme1  | 37.0  | 6.3 | +   | +  | +     | +    | +      | +            | Gaussian<br>(identity) | corAR1()    | varIdent(~1 <br>Year*Trt) | Yr/T   | 27 | -489.4 | 1042.8 | 0     | 1      |         |
| lme2  | 37.2  | 6.2 | +   | +  | +     | +    | +      | +            | Gaussian<br>(identity) |             |                           | Yr/T   | 19 | -519.3 | 1081.4 | 38.5  | 0      | <.0001  |
| lme3  | 36.9  | 6.3 | +   | +  | +     | +    | +      | +            | Gaussian<br>(identity) | corAR1()    |                           | Yr/T   | 20 | -519.1 | 1083.6 | 40.7  | 0      | <.0001  |
| lme4  | 37.2  | 6.2 | +   | +  | +     | +    | +      | +            | Gaussian<br>(identity) |             | varIdent(~1 <br>Year*Trt) | Y      | 25 | -624.8 | 1308.1 | 265.3 | 0      | <.0001  |

**TABLE S3** | The mixed ANOVA model for the effects of Year (Yr), measurement time (Tim), Treatment (Trt), and their interactions on plant height, Chlorophyll fluorescence ratio (ChlF ratio), Chlorophyll content (Chlc), and leaf surface temperature (LST), with time nested in year as the random factor.

| Year | Explanatory variables   | Response variables |         |         |     |               |         |     |                |         |     |                |         |     |
|------|-------------------------|--------------------|---------|---------|-----|---------------|---------|-----|----------------|---------|-----|----------------|---------|-----|
|      |                         | Plant height (cm)  |         |         |     | ChlF ratio    |         |     | Chlc           |         |     | LST            |         |     |
|      |                         | DF                 | F-value | P-value |     | F-value       | P-value |     | F-value        | P-value |     | F-value        | P-value |     |
| Both | Year (Yr)               | 1,164              | 204.2   | <.0001  | *** | 331.5         | <.0001  | *** | 325.0          | <.0001  | *** | 16.1           | <.0001  | *** |
|      | Measurement time (Tim)  | 1,164              | 408.2   | <.0001  | *** | 131.1         | <.0001  | *** | 129.3          | <.0001  | *** | 0.3            | 0.59    | ns  |
|      | Treatment (Trt)         | 3,164              | 24.2    | <.0001  | *** | 1.1           | 0.386   | ns  | 1.2            | 0.299   | ns  | 0.7            | 0.556   | ns  |
|      | Yr:Tim                  | 1,164              | 21.5    | <.0001  | *** | 89.8          | <.0001  | *** | 89.9           | <.0001  | *** | 24.3           | <.0001  | *** |
|      | Yr:Trt                  | 3,164              | 3.1     | 0.030   | *   | 0.5           | 0.708   | ns  | 0.6            | 0.639   | ns  | 0.4            | 0.721   | ns  |
|      | Tim:Trt                 | 3,164              | 4.3     | 0.006   | **  | 6.3           | 0.000   | *** | 5.5            | 0.001   | **  | 1.2            | 0.305   | ns  |
|      | Yr:Tim:Trt              | 3,164              | 1.6     | 0.202   | ns  | 2.0           | 0.112   | ns  | 1.9            | 0.130   | ns  | 0.3            | 0.793   | ns  |
|      | Random effect: (Yr Tim) | StdDev = 10.94     |         |         |     | StdDev = 0.16 |         |     | StdDev = 102.5 |         |     | StdDev = 9.73  |         |     |
| 2020 |                         |                    |         |         |     |               |         |     |                |         |     |                |         |     |
|      | Measurement time (Tim)  | 1,88               | 184.3   | <.0001  | *** | 311.5         | <.0001  | *** | 312.9          | <.0001  | *** | 16.8           | <.0001  | *** |
|      | Treatment (Trt)         | 3,88               | 22.4    | <.0001  | *** | 0.2           | 0.898   | ns  | 0.2            | 0.894   | ns  | 1.3            | 0.276   | ns  |
|      | Tim:Trt                 | 3,88               | 5.7     | <.0001  | **  | 4.5           | 0.005   | **  | 4.6            | 0.005   | **  | 2.2            | 0.0954  | ns  |
|      | Random effect (Tim)     | StdDev = 7.51      |         |         |     | StdDev = 0.1  |         |     | StdDev = 63.09 |         |     | StdDev = 0.002 |         |     |
| 2021 |                         |                    |         |         |     |               |         |     |                |         |     |                |         |     |
|      | Measurement time (Tim)  | 1,76               | 218.6   | <.0001  | *** | 2.2           | 0.141   | ns  | 2.0            | 0.157   | ns  | 9.9            | 0.002   | **  |
|      | Treatment (Trt)         | 3,76               | 9.4     | <.0001  | *** | 1.1           | 0.374   | ns  | 1.2            | 0.307   | ns  | 0.2            | 0.869   | ns  |
|      | Tim:Trt                 | 3,76               | 1.6     | 0.192   | ns  | 3.8           | 0.013   | *   | 3.1            | 0.031   | *   | 0.2            | 0.920   | ns  |
|      | Random effect (Tim)     | StdDev = 13.18     |         |         |     | StdDev = 0.13 |         |     | StdDev = 86.78 |         |     | StdDev = 0.02  |         |     |

Asterisks indicate level of significance (ns <0.1, \* <0.05, \*\* <0.01, \*\*\* <0.001).



**TABLE S4** | The mixed ANOVA model for the effects of Year (Yr), measurement time (Tim), Treatment (Trt), and their interactions on the resilience of soybean in terms of the measured plant height, Chlorophyll florescence ratio (ChlF ratio), Chlorophyll content (Chlc), and leaf surface temperature (LST), with time nested in year as the random factor.

| Year        | Explanatory variables   | Response variables          |         |         |     |                           |         |     |                     |         |     |                    |         |     |
|-------------|-------------------------|-----------------------------|---------|---------|-----|---------------------------|---------|-----|---------------------|---------|-----|--------------------|---------|-----|
|             |                         | Resilience for plant height |         |         |     | Resilience for ChlF ratio |         |     | Resilience for Chlc |         |     | Resilience for LST |         |     |
| Both        | <b>Both years:</b>      | DF                          | F-value | P-value |     | F-value                   | P-value |     | F-value             | P-value | 0   | F-value            | P-value |     |
|             | Year (Yr)               | 1,52                        | 8.3     | <.0001  | *** | 6.5                       | 0.0136  | ns  | 8.3                 | 0.0058  | ns  | 1.5                | <.0001  | *** |
|             | Measurement time (Tim)  | 1,52                        | 0.1     | <.0001  | *** | 4.7                       | <.0001  | *** | 5.0                 | <.0001  | *** | 9.5                | 0.00326 | *** |
|             | Treatment (Trt)         | 1,52                        | 57.1    | <.0001  | *** | 0.5                       | 0.464   | ns  | 0.0                 | 0.894   | ns  | 20.3               | 3.8E-05 | *** |
|             | Yr:Tim                  | 1,52                        | 8.0     | 0.0068  | ns  | 0.6                       | 0.433   | ns  | 0.2                 | 0.659   | ns  | 2.4                | 0.127   | ns  |
|             | Yr:Trt                  | 1,52                        | 1.1     | 0.306   | ns  | 28.8                      | 0.000   | *** | 31.5                | 0.000   | *** | 3.6                | 0.064   | **  |
|             | Tim:Trt                 | 1,52                        | 1.3     | 0.259   | ns  | 14.6                      | <.0001  | *** | 11.3                | <.0001  | *** | 1.2                | <.0001  | *** |
|             | Yr:Tim:Trt              | 1,52                        | 0.2     | 0.677   | ns  | 1.1                       | <.0001  | *** | 0.4                 | <.0001  | *** | 0.2                | 0.667   | ns  |
|             | Random effect: (Yr Tim) | StdDev = 0.12               |         |         |     | StdDev = 0.16             |         |     | StdDev = 102.5      |         |     | StdDev = 9.73      |         |     |
| <b>2020</b> |                         |                             |         |         |     |                           |         |     |                     |         |     |                    |         |     |
|             | Measurement time (Tim)  | 1,29                        | 4.4     | <.0001  | *** | 4.7                       | <.0001  | *** | 3.5                 | <.0001  | *** | 7.4                | 0.01082 | *** |
|             | Treatment (Trt)         | 1,29                        | 34.5    | <.0001  | *** | 17.3                      | 0.000   | *** | 12.1                | 0.002   | *** | 14.5               | 0.00068 | *** |
|             | Tim:Trt                 | 1,29                        | 1.1     | <.0001  | *** | 6.1                       | <.0001  | *** | 5.1                 | 0.032   | *   | 0.3                | <.0001  | *** |
|             | Random effect (Tim)     | StdDev = 0.16               |         |         |     | StdDev = 3.63             |         |     | StdDev = 1.67       |         |     | StdDev = 0.00      |         |     |
| <b>2021</b> |                         |                             |         |         |     |                           |         |     |                     |         |     |                    |         |     |
|             | Measurement time (Tim)  | 1,23                        | 4.4     | <.0001  | *** | 0.9                       | <.0001  | *** | 1.7                 | 0.208   | ns  | 2.7                | 0.114   | ns  |
|             | Treatment (Trt)         | 1,23                        | 21.9    | <.0001  | *** | 12.1                      | 0.002   | **  | 20.0                | 0.000   | ns  | 5.8                | 0.024   | ns  |
|             | Tim:Trt                 | 1,23                        | 0.2     | 0.6879  | ns  | 9.2                       | <.0001  | **  | 6.8                 | 0.016   | *** | 2.7                | 0.113   | ns  |
|             | Random effect (Tim)     | StdDev = 0.05               |         |         |     | StdDev = 0.00             |         |     | StdDev = 0.00       |         |     | StdDev = 0.09      |         |     |

Asterisks indicate level of significance (ns <0.1, \* <0.05, \*\* <0.01, \*\*\* <0.001).
